# Supplementary material for: Design of Novel Phosphatidylinositol 3-Kinase Inhibitors for Non-Hodgkin’s Lymphoma: Molecular Docking, Molecular Dynamics, and Density Functional Theory Studies on Gold Nanoparticles
Source: MDPI journal article supplement (doi:10.3390/molecules28052289), 2023-03-01
Supplement: s1 [file s1]

# Design of Novel Phosphoinositol 3-kinase Inhibitors for Non-Hodgkin's Lymphoma: Molecular Docking, Molecular Dynamics, and Density Functional Theory Studies on Gold Nanoparticles

Abdulahim M. Ali<sup>1</sup>, Alaa A. Makki<sup>1</sup>, Walaa Ibraheem<sup>1</sup>, Mohammed Abdelrahman<sup>2</sup>, Wadah Osman<sup>3,4</sup>, Asmaa E. Sherif<sup>3,5</sup>, Ahmed Ashour<sup>3,5</sup>, Sabrin R. M. Ibrahim<sup>6,7</sup>, Kholoud F. Ghazawi<sup>8</sup>, Waad A. Samman<sup>9</sup>, Abdulrahim A. Alzain<sup>1\*</sup>

<sup>1</sup>Department of Pharmaceutical Chemistry, Faculty of Pharmacy, University of Gezira, Gezira, Sudan

<sup>2</sup>Department of Pharmaceutics, Faculty of Pharmacy, University of Gezira, Gezira, Sudan

<sup>3</sup>Department of Pharmacognosy, Faculty of Pharmacy, Prince Sattam Bin Abdulaziz University, Al-kharj 11942, Saudi Arabia

<sup>4</sup>Department of Pharmacognosy, Faculty of Pharmacy, University of Khartoum, Al-Qasr Ave, 11111, Khartoum, Sudan

<sup>5</sup>Department of Pharmacognosy, Faculty of Pharmacy, Mansoura University, Mansoura 35516, Egypt

<sup>6</sup>Preparatory Year Program, Department of Chemistry, Batterjee Medical College, Jeddah 21442, Saudi Arabia

<sup>7</sup>Department of Pharmacognosy, Faculty of Pharmacy, Assiut University, Assiut 71526, Egypt

<sup>8</sup>Clinical Pharmacy Department, College of Pharmacy, Umm Al-Qura University, Makkah 24382, Saudi Arabia

<sup>9</sup>Department of Pharmacology and Toxicology, College of Pharmacy, Taibah University, Al-Madinah Al-Munawwarah 30078, Saudi Arabia

\*Corresponding author: Abdulrahim A. Alzain,

E-mail: [abdulrahim.altoam@uofg.edu.sd](mailto:abdulrahim.altoam@uofg.edu.sd); [abdulrahim.altoam@gmail.com](mailto:abdulrahim.altoam@gmail.com) (A.A.A)

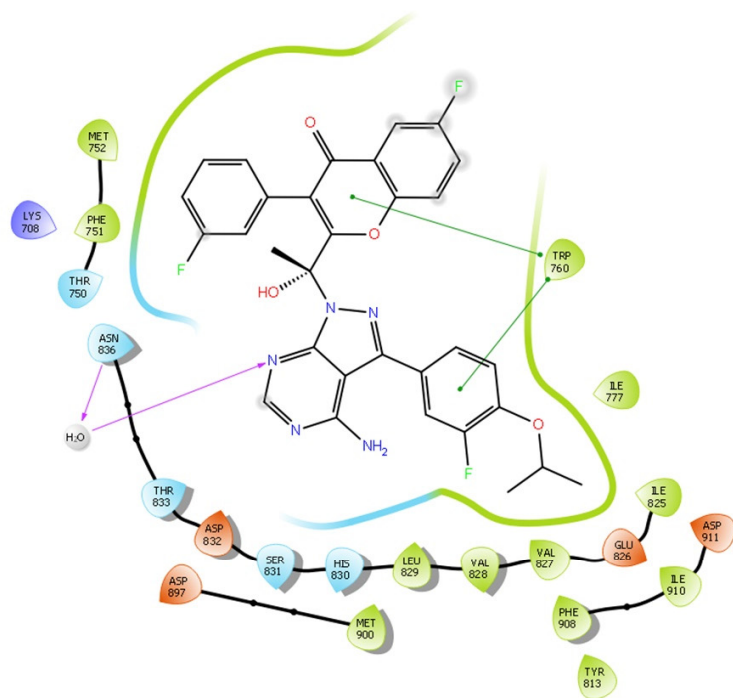

analogue 101

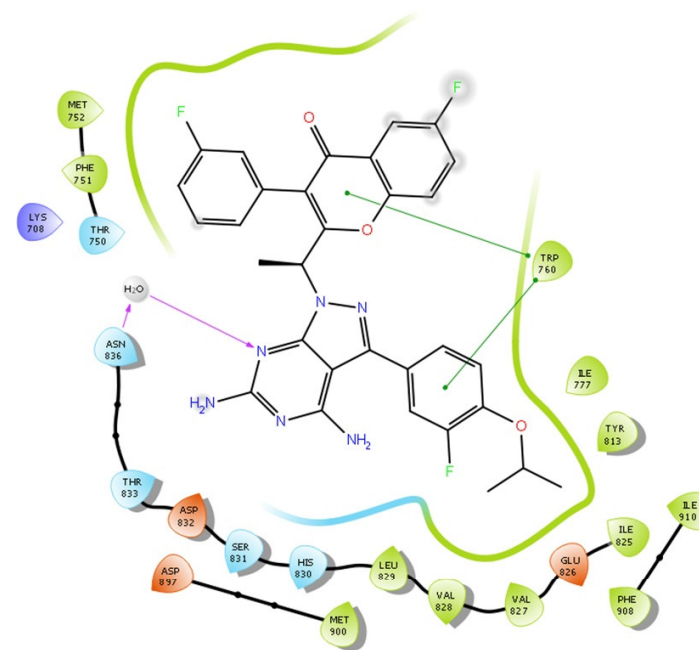

analogue 131

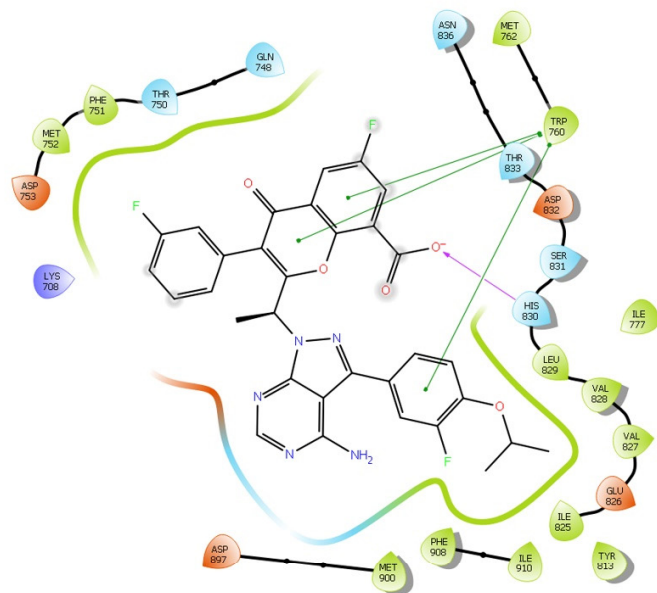

analogue 201

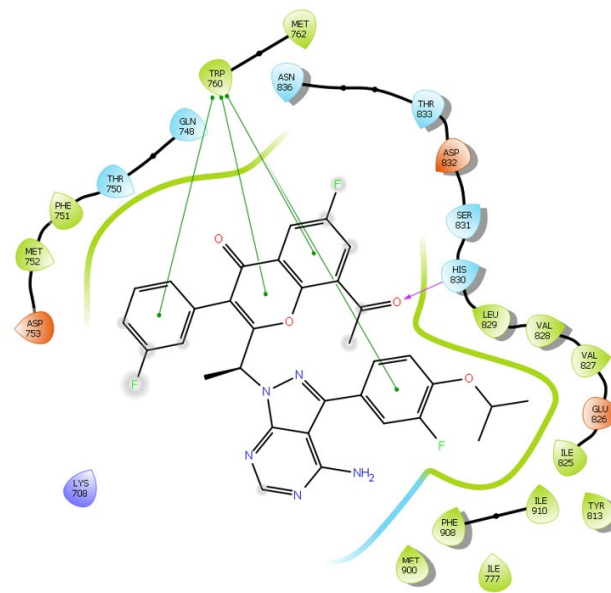

analogue 205

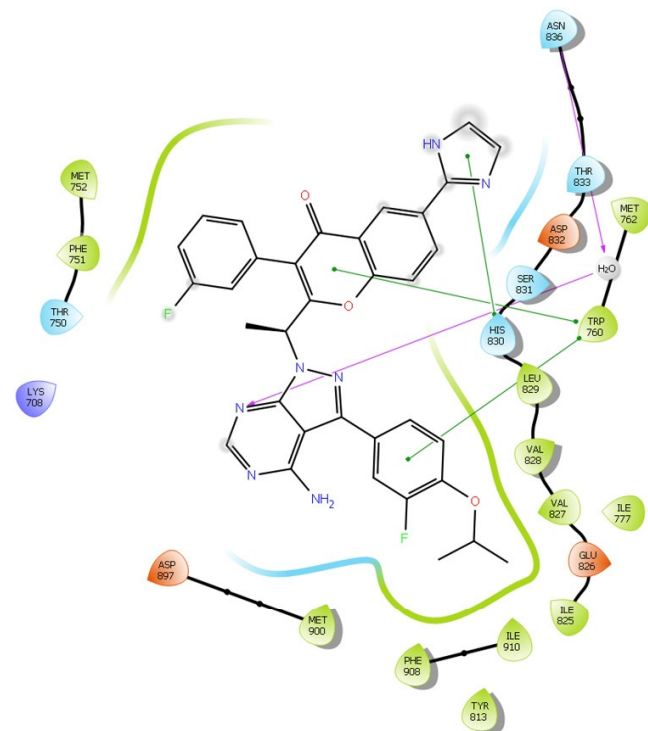

analogue 223

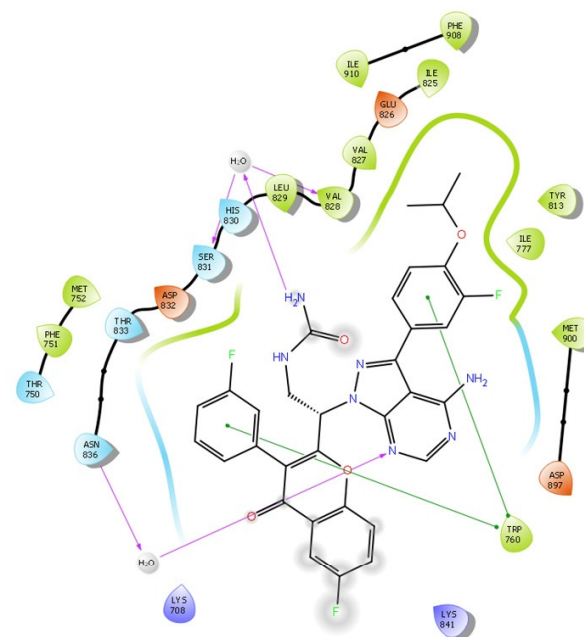

analogue 262

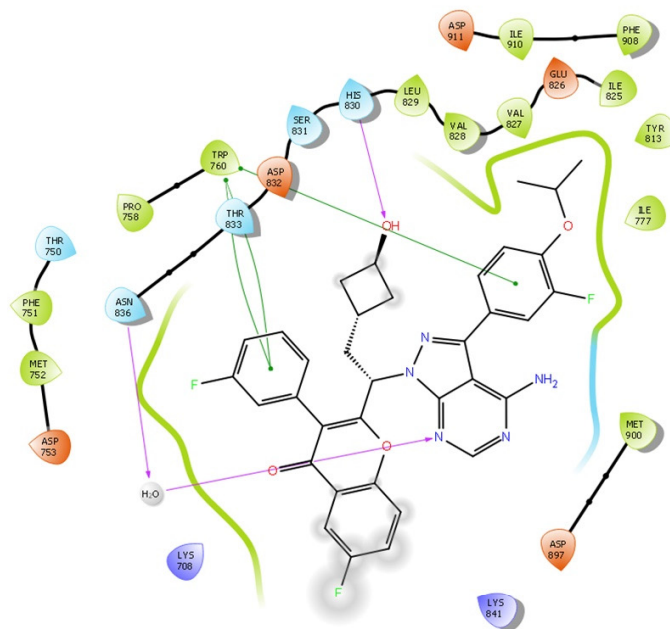

analogue 268

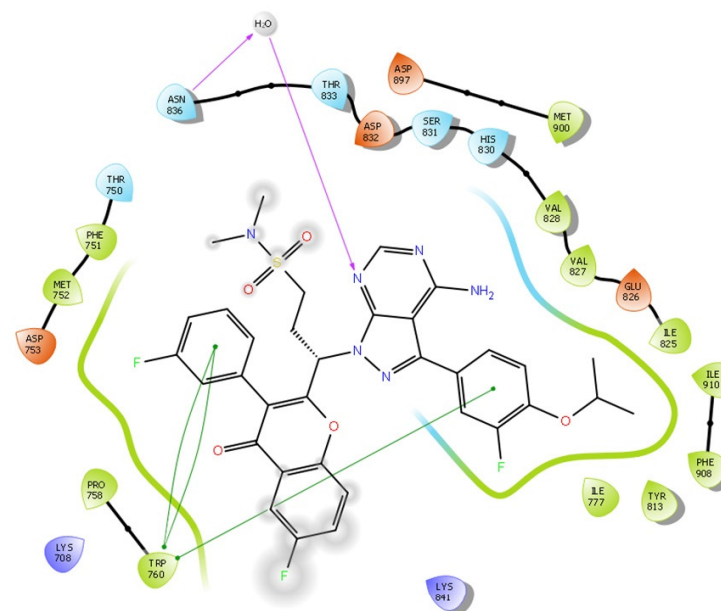

analogue 293

**Figure S1.** 2D interaction of the remaining top eight analogues in complex with PI3Kδ protein (PDB ID:4XE0) using the XP docking mode of Glide software. The hydrogen bond interactions with residues are represented by a purple dashed arrow directed towards the electron donor. The hydrophobic residues are in green color.

**Table S1:** Docking scores of the designed analogues.

| Title      | Structure                                                                             | docking score<br>(kcal/mol) |
|------------|---------------------------------------------------------------------------------------|-----------------------------|
| Analoguue1 | 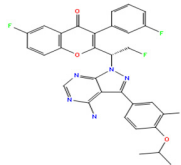   | -7.262                      |
| Analoguue2 |   | -7.228                      |
| Analoguue3 |  | -7.226                      |

|           |                                                                                       |        |
|-----------|---------------------------------------------------------------------------------------|--------|
| Analogue4 | 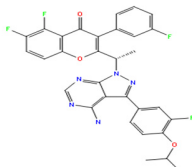   | -7.286 |
| Analogue5 |    | -7.684 |
| Analogue6 |    | -7.291 |
| Analogue7 |  | -7.017 |

|            |                                                                                       |        |
|------------|---------------------------------------------------------------------------------------|--------|
| Analogue8  | 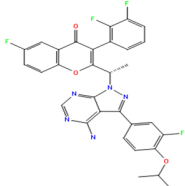   | -7.302 |
| Analogue9  |    | -7.110 |
| Analogue10 |    | -6.884 |
| Analogue11 |  | -7.169 |



|            |                                                                                      |        |
|------------|--------------------------------------------------------------------------------------|--------|
| Analogue12 | 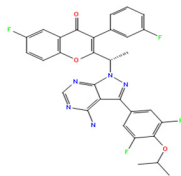  | -7.656 |
| Analogue13 |   | -7.243 |
| Analogue14 |   | -7.081 |
| Analogue15 |  | -7.148 |

|            |                                                                                      |        |
|------------|--------------------------------------------------------------------------------------|--------|
| Analogue16 | 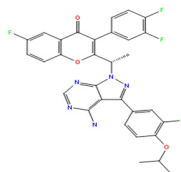  | -7.575 |
| Analogue17 |   | -7.097 |
| Analogue18 |   | -6.178 |
| Analogue19 |  | -7.280 |

|            |                                                                                      |        |
|------------|--------------------------------------------------------------------------------------|--------|
| Analogue20 | 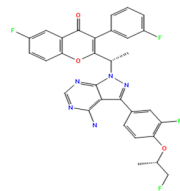  | -7.207 |
| Analogue21 |   | -7.239 |
| Analogue22 |   | -7.555 |
| Analogue23 |  | -7.569 |

|            |                                                                                      |        |
|------------|--------------------------------------------------------------------------------------|--------|
| Analogue24 |   | -7.547 |
| Analogue25 |   | -7.400 |
| Analogue26 |   | -7.467 |
| Analogue27 |  | -7.450 |

|            |                                                                                      |           |
|------------|--------------------------------------------------------------------------------------|-----------|
| Analogue28 | 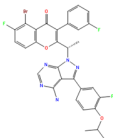  | -7.480    |
| Analogue29 |   | -7.731    |
| Analogue30 |   | -7.269    |
| Analogue31 |  | 10000.000 |

|            |                                                                                      |           |
|------------|--------------------------------------------------------------------------------------|-----------|
| Analogue32 | 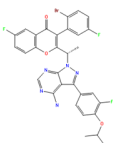  | -7.487    |
| Analogue33 |   | 10000.000 |
| Analogue34 |   | -7.350    |
| Analogue35 |  | -7.676    |

|            |                                                                                      |           |
|------------|--------------------------------------------------------------------------------------|-----------|
| Analogue36 | 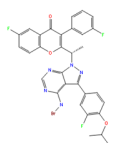  | 10000.000 |
| Analogue37 |   | -7.566    |
| Analogue38 |   | -6.797    |
| Analogue39 |  | -7.170    |

|            |                                                                                      |           |
|------------|--------------------------------------------------------------------------------------|-----------|
| Analogue40 | 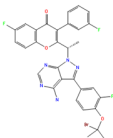  | 10000.000 |
| Analogue41 |   | 10000.000 |
| Analogue42 |   | -6.639    |
| Analogue43 |  | -6.479    |



|            |                                                                                      |        |
|------------|--------------------------------------------------------------------------------------|--------|
| Analogue44 |   | -6.423 |
| Analogue45 |   | -7.364 |
| Analogue46 |   | -7.332 |
| Analogue47 |  | -7.329 |

|            |                                                                                      |           |
|------------|--------------------------------------------------------------------------------------|-----------|
| Analogue48 |   | -7.337    |
| Analogue49 |   | -7.603    |
| Analogue50 |   | -7.278    |
| Analogue51 |  | 10000.000 |

|            |                                                                                      |        |
|------------|--------------------------------------------------------------------------------------|--------|
| Analogue52 |   | -7.398 |
| Analogue53 |   | -5.203 |
| Analogue54 |   | -7.271 |
| Analogue55 |  | -7.574 |

|            |                                                                                      |        |
|------------|--------------------------------------------------------------------------------------|--------|
| Analogue56 | 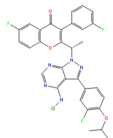  | -5.336 |
| Analogue57 |   | -6.924 |
| Analogue58 |   | -6.729 |
| Analogue59 |  | -7.252 |

|            |                                                                                      |           |
|------------|--------------------------------------------------------------------------------------|-----------|
| Analogue60 | 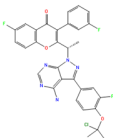  | 10000.000 |
| Analogue61 |   | -5.516    |
| Analogue62 |   | 10000.000 |
| Analogue63 |  | -4.993    |

|            |                                                                                      |        |
|------------|--------------------------------------------------------------------------------------|--------|
| Analogue64 |   | -5.111 |
| Analogue65 |   | -7.069 |
| Analogue66 |   | -7.038 |
| Analogue67 |  | -6.990 |

|            |                                                                                      |        |
|------------|--------------------------------------------------------------------------------------|--------|
| Analogue68 |   | -7.577 |
| Analogue69 |   | -7.539 |
| Analogue70 |   | -7.535 |
| Analogue71 |  | -7.544 |

|            |                                                                                      |           |
|------------|--------------------------------------------------------------------------------------|-----------|
| Analogue72 |   | -7.791    |
| Analogue73 |   | -7.428    |
| Analogue74 |   | 10000.000 |
| Analogue75 |  | -7.520    |



|            |                                                                                      |        |
|------------|--------------------------------------------------------------------------------------|--------|
| Analogue76 |   | -5.730 |
| Analogue77 |   | -7.485 |
| Analogue78 |   | -7.663 |
| Analogue79 |  | -5.949 |

|            |                                                                                      |           |
|------------|--------------------------------------------------------------------------------------|-----------|
| Analogue80 |   | -7.642    |
| Analogue81 |   | -7.522    |
| Analogue82 |   | -7.485    |
| Analogue83 |  | 10000.000 |

|            |                                                                                      |        |
|------------|--------------------------------------------------------------------------------------|--------|
| Analogue84 |   | -6.884 |
| Analogue85 |   | -6.906 |
| Analogue86 |   | -6.924 |
| Analogue87 |  | -7.362 |

|            |                                                                                      |        |
|------------|--------------------------------------------------------------------------------------|--------|
| Analogue88 | 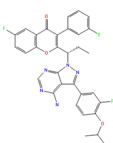  | -7.233 |
| Analogue89 |   | -7.215 |
| Analogue90 |   | -7.210 |
| Analogue91 |  | -7.507 |

|            |                                                                                      |        |
|------------|--------------------------------------------------------------------------------------|--------|
| Analogue92 |   | -7.017 |
| Analogue93 |   | -7.310 |
| Analogue94 |   | -7.417 |
| Analogue95 |  | -7.307 |

|            |                                                                                      |        |
|------------|--------------------------------------------------------------------------------------|--------|
| Analogue96 |   | -7.268 |
| Analogue97 |   | -7.314 |
| Analogue98 |   | -6.096 |
| Analogue99 |  | -5.259 |

|             |                                                                                      |        |
|-------------|--------------------------------------------------------------------------------------|--------|
| Analogue100 |   | -6.725 |
| Analogue101 |   | -8.242 |
| Analogue102 |   | -7.438 |
| Analogue103 |  | -7.443 |

|             |                                                                                      |        |
|-------------|--------------------------------------------------------------------------------------|--------|
| Analogue104 |   | -7.236 |
| Analogue105 |   | -7.344 |
| Analogue106 |   | -7.426 |
| Analogue107 |  | -6.232 |



|             |                                                                                      |        |
|-------------|--------------------------------------------------------------------------------------|--------|
| Analogue108 |   | -7.410 |
| Analogue109 |   | -7.800 |
| Analogue110 |   | -7.469 |
| Analogue111 |  | -6.456 |

|             |                                                                                      |        |
|-------------|--------------------------------------------------------------------------------------|--------|
| Analogue112 |   | -7.372 |
| Analogue113 |   | -7.365 |
| Analogue114 |   | -7.277 |
| Analogue115 |  | -7.281 |

|             |                                                                                      |        |
|-------------|--------------------------------------------------------------------------------------|--------|
| Analogue116 | 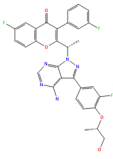  | -6.680 |
| Analogue117 |   | -6.556 |
| Analogue118 |   | -6.372 |
| Analogue119 |  | -6.357 |

|             |                                                                                      |        |
|-------------|--------------------------------------------------------------------------------------|--------|
| Analogue120 |   | -7.673 |
| Analogue121 |   | -7.665 |
| Analogue122 |   | -7.484 |
| Analogue123 |  | -7.376 |

|             |                                                                                      |        |
|-------------|--------------------------------------------------------------------------------------|--------|
| Analogue124 |   | -7.179 |
| Analogue125 |   | -7.177 |
| Analogue126 |   | -7.177 |
| Analogue127 |  | -7.386 |

|             |                                                                                      |        |
|-------------|--------------------------------------------------------------------------------------|--------|
| Analogue128 |   | -7.372 |
| Analogue129 |   | -6.069 |
| Analogue130 |   | -7.324 |
| Analogue131 |  | -7.721 |

|             |                                                                                      |        |
|-------------|--------------------------------------------------------------------------------------|--------|
| Analogue132 |   | -7.399 |
| Analogue133 |   | -5.842 |
| Analogue134 |   | -7.288 |
| Analogue135 |  | -7.281 |

|             |                                                                                      |           |
|-------------|--------------------------------------------------------------------------------------|-----------|
| Analogue136 |   | -6.939    |
| Analogue137 |   | 10000.000 |
| Analogue138 |   | 10000.000 |
| Analogue139 |  | 10000.000 |



|             |                                                                                      |        |
|-------------|--------------------------------------------------------------------------------------|--------|
| Analogue140 | 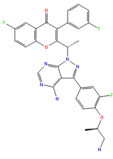  | -6.899 |
| Analogue141 |   | -7.140 |
| Analogue142 |   | -6.964 |
| Analogue143 |  | -7.542 |

|             |                                                                                      |        |
|-------------|--------------------------------------------------------------------------------------|--------|
| Analogue144 | 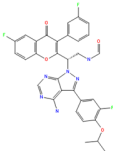  | -7.208 |
| Analogue145 |   | -7.202 |
| Analogue146 |   | -7.202 |
| Analogue147 |  | -7.633 |

|             |                                                                                      |        |
|-------------|--------------------------------------------------------------------------------------|--------|
| Analogue148 | 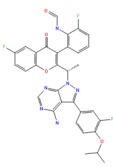  | -8.119 |
| Analogue149 |   | -7.397 |
| Analogue150 |   | -7.703 |
| Analogue151 |  | -7.514 |

|             |                                                                                      |        |
|-------------|--------------------------------------------------------------------------------------|--------|
| Analogue152 | 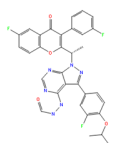  | -7.444 |
| Analogue153 |   | -7.717 |
| Analogue154 |   | -6.188 |
| Analogue155 |  | -7.028 |

|             |                                                                                      |        |
|-------------|--------------------------------------------------------------------------------------|--------|
| Analogue156 | 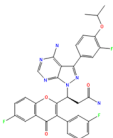  | -7.209 |
| Analogue157 |   | -7.054 |
| Analogue158 |   | -7.505 |
| Analogue159 |  | -7.711 |

|             |                                                                                      |        |
|-------------|--------------------------------------------------------------------------------------|--------|
| Analogue160 | 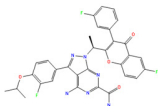  | -7.580 |
| Analogue161 |   | -7.499 |
| Analogue162 |   | -7.922 |
| Analogue163 |  | -6.344 |

|             |                                                                                      |        |
|-------------|--------------------------------------------------------------------------------------|--------|
| Analogue164 | 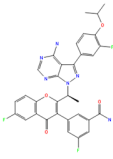  | -4.694 |
| Analogue165 |   | -7.041 |
| Analogue166 |   | -7.636 |
| Analogue167 |  | -7.434 |

|             |                                                                                      |        |
|-------------|--------------------------------------------------------------------------------------|--------|
| Analogue168 | 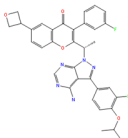  | -7.635 |
| Analogue169 |   | -7.549 |
| Analogue170 |   | -7.296 |
| Analogue171 |  | -7.920 |



|             |                                                                                      |        |
|-------------|--------------------------------------------------------------------------------------|--------|
| Analogue172 | 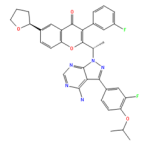  | -7.697 |
| Analogue173 |   | -7.833 |
| Analogue174 |   | -8.461 |
| Analogue175 |  | -7.779 |

|             |                                                                                      |        |
|-------------|--------------------------------------------------------------------------------------|--------|
| Analogue176 | 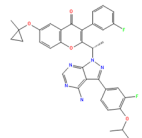  | -7.734 |
| Analogue177 |   | -7.923 |
| Analogue178 |   | -7.497 |
| Analogue179 |  | -7.822 |

|             |                                                                                      |        |
|-------------|--------------------------------------------------------------------------------------|--------|
| Analogue180 | 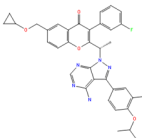  | -7.546 |
| Analogue181 |   | -7.588 |
| Analogue182 |   | -7.785 |
| Analogue183 |  | -7.672 |

|             |                                                                                      |        |
|-------------|--------------------------------------------------------------------------------------|--------|
| Analogue184 | 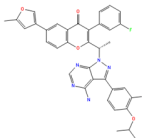  | -7.444 |
| Analogue185 |   | -7.542 |
| Analogue186 |   | -7.791 |
| Analogue187 |  | -7.657 |

|             |                                                                                      |        |
|-------------|--------------------------------------------------------------------------------------|--------|
| Analogue188 | 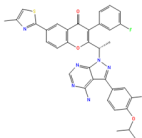  | -7.816 |
| Analogue189 |   | -7.900 |
| Analogue190 |   | -7.797 |
| Analogue191 |  | -7.904 |

|             |                                                                                      |        |
|-------------|--------------------------------------------------------------------------------------|--------|
| Analogue192 |   | -7.756 |
| Analogue193 |   | -7.704 |
| Analogue194 |   | -5.903 |
| Analogue195 |  | -6.822 |

|             |                                                                                      |           |
|-------------|--------------------------------------------------------------------------------------|-----------|
| Analogue196 |   | 10000.000 |
| Analogue197 |   | 10000.000 |
| Analogue198 |   | -7.683    |
| Analogue199 |  | -7.135    |

|             |                                                                                      |        |
|-------------|--------------------------------------------------------------------------------------|--------|
| Analogue200 | 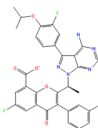  | -7.123 |
| Analogue201 |   | -7.834 |
| Analogue202 |   | -7.923 |
| Analogue203 |  | -7.398 |



|             |                                                                                      |        |
|-------------|--------------------------------------------------------------------------------------|--------|
| Analogue204 | 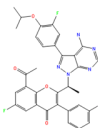  | -6.573 |
| Analogue205 |   | -7.894 |
| Analogue206 |   | -7.908 |
| Analogue207 |  | -4.389 |

|             |                                                                                      |        |
|-------------|--------------------------------------------------------------------------------------|--------|
| Analogue208 | 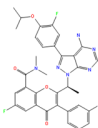  | -3.753 |
| Analogue209 |   | -5.882 |
| Analogue210 |   | -8.298 |
| Analogue211 |  | -6.754 |

|             |                                                                                       |        |
|-------------|---------------------------------------------------------------------------------------|--------|
| Analogue212 |    | -4.672 |
| Analogue213 |    | -8.155 |
| Analogue214 |    | -6.735 |
| Analogue215 |  | -6.789 |

|             |                                                                                      |        |
|-------------|--------------------------------------------------------------------------------------|--------|
| Analogue216 |   | -7.261 |
| Analogue217 |   | -7.576 |
| Analogue218 |   | -7.567 |
| Analogue219 |  | -7.828 |

|             |                                                                                      |        |
|-------------|--------------------------------------------------------------------------------------|--------|
| Analogue220 | 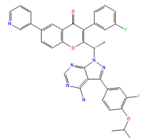  | -7.702 |
| Analogue221 |   | -7.806 |
| Analogue222 |   | -7.725 |
| Analogue223 |  | -8.103 |

|             |                                                                                      |        |
|-------------|--------------------------------------------------------------------------------------|--------|
| Analogue224 | 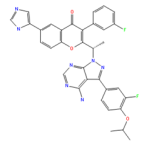  | -7.633 |
| Analogue225 |   | -7.531 |
| Analogue226 |   | -7.820 |
| Analogue227 |  | -7.958 |

|             |                                                                                      |        |
|-------------|--------------------------------------------------------------------------------------|--------|
| Analogue228 | 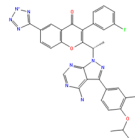  | -7.787 |
| Analogue229 |   | -7.357 |
| Analogue230 |   | -7.257 |
| Analogue231 |  | -7.348 |

|             |                                                                                      |        |
|-------------|--------------------------------------------------------------------------------------|--------|
| Analogue232 | 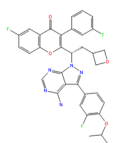  | -7.377 |
| Analogue233 |   | -7.289 |
| Analogue234 |   | -7.391 |
| Analogue235 |  | -7.350 |



|             |                                                                                      |        |
|-------------|--------------------------------------------------------------------------------------|--------|
| Analogue236 |   | -7.371 |
| Analogue237 |   | -7.298 |
| Analogue238 |   | -7.395 |
| Analogue239 |  | -7.397 |

|             |                                                                                      |        |
|-------------|--------------------------------------------------------------------------------------|--------|
| Analogue240 | 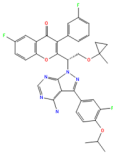  | -7.297 |
| Analogue241 |   | -7.412 |
| Analogue242 |   | -7.383 |
| Analogue243 |  | -7.418 |

|             |                                                                                      |        |
|-------------|--------------------------------------------------------------------------------------|--------|
| Analogue244 |   | -7.502 |
| Analogue245 |   | -7.337 |
| Analogue246 |   | -7.237 |
| Analogue247 |  | -7.184 |

|             |                                                                                      |        |
|-------------|--------------------------------------------------------------------------------------|--------|
| Analogue248 | 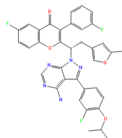  | -7.343 |
| Analogue249 |   | -7.467 |
| Analogue250 |   | -7.462 |
| Analogue251 |  | -7.395 |

|             |                                                                                      |        |
|-------------|--------------------------------------------------------------------------------------|--------|
| Analogue252 | 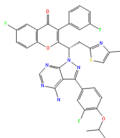  | -7.356 |
| Analogue253 |   | -7.366 |
| Analogue254 |   | -7.370 |
| Analogue255 |  | -7.362 |

|             |                                                                                      |        |
|-------------|--------------------------------------------------------------------------------------|--------|
| Analogue256 | 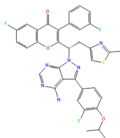  | -7.371 |
| Analogue257 |   | -7.415 |
| Analogue258 |   | -7.346 |
| Analogue259 |  | -7.479 |

|             |                                                                                      |        |
|-------------|--------------------------------------------------------------------------------------|--------|
| Analogue260 | 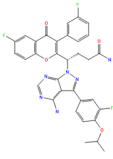  | -7.219 |
| Analogue261 |   | -7.683 |
| Analogue262 |   | -8.425 |
| Analogue263 |  | -7.159 |

|             |                                                                                      |        |
|-------------|--------------------------------------------------------------------------------------|--------|
| Analogue264 |   | -7.365 |
| Analogue265 |   | -7.378 |
| Analogue266 |   | -7.265 |
| Analogue267 |  | -7.295 |



|             |                                                                                      |        |
|-------------|--------------------------------------------------------------------------------------|--------|
| Analogue268 |   | -8.023 |
| Analogue269 |   | -7.553 |
| Analogue270 |   | -7.309 |
| Analogue271 |  | -7.376 |

|             |                                                                                      |        |
|-------------|--------------------------------------------------------------------------------------|--------|
| Analogue272 |   | -7.370 |
| Analogue273 |   | -7.446 |
| Analogue274 |   | -7.487 |
| Analogue275 |  | -7.397 |

|             |                                                                                      |        |
|-------------|--------------------------------------------------------------------------------------|--------|
| Analogue276 | 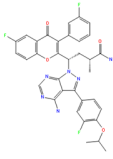  | -7.297 |
| Analogue277 |   | -7.457 |
| Analogue278 |   | -7.117 |
| Analogue279 |  | -7.548 |

|             |                                                                                      |        |
|-------------|--------------------------------------------------------------------------------------|--------|
| Analogue280 |   | -7.116 |
| Analogue281 |   | -7.284 |
| Analogue282 |   | -7.873 |
| Analogue283 |  | -7.330 |

|             |                                                                                      |        |
|-------------|--------------------------------------------------------------------------------------|--------|
| Analogue284 | 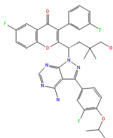  | -7.518 |
| Analogue285 |   | -7.307 |
| Analogue286 |   | -7.637 |
| Analogue287 |  | -7.527 |

|             |                                                                                      |        |
|-------------|--------------------------------------------------------------------------------------|--------|
| Analogue288 | 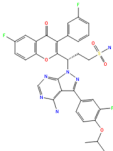  | -7.370 |
| Analogue289 |   | -7.478 |
| Analogue290 |   | -7.709 |
| Analogue291 |  | -7.404 |

|             |                                                                                      |        |
|-------------|--------------------------------------------------------------------------------------|--------|
| Analogue292 | 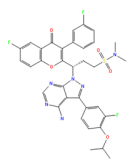  | -7.242 |
| Analogue293 |   | -7.667 |
| Analogue294 |   | -7.639 |
| Analogue295 |  | -7.636 |

|             |                                                                                      |        |
|-------------|--------------------------------------------------------------------------------------|--------|
| Analogue296 | 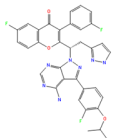  | -7.267 |
| Analogue297 |   | -7.284 |
| Analogue298 |   | -7.404 |
| Analogue299 |  | -7.350 |



|             |                                                                                      |        |
|-------------|--------------------------------------------------------------------------------------|--------|
| Analogue300 | 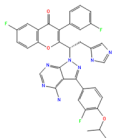  | -7.280 |
| Analogue301 |   | -7.586 |
| Analogue302 |   | -7.585 |
| Analogue303 |  | -7.311 |

|             |                                                                                      |        |
|-------------|--------------------------------------------------------------------------------------|--------|
| Analogue304 |   | -7.419 |
| Analogue305 |   | -7.317 |
| Analogue306 |   | -7.682 |
| Analogue307 |  | -7.275 |

|             |                                                                                      |        |
|-------------|--------------------------------------------------------------------------------------|--------|
| Analogue308 | 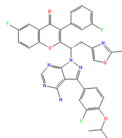  | -7.202 |
| Analogue309 |   | -7.316 |
| Analogue310 |   | -7.306 |
| Analogue311 |  | -7.330 |

|             |                                                                                      |        |
|-------------|--------------------------------------------------------------------------------------|--------|
| Analogue312 | 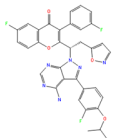  | -7.341 |
| Analogue313 |   | -7.451 |
| Analogue314 |   | -7.525 |
| Analogue315 |  | -7.516 |

|             |                                                                                      |        |
|-------------|--------------------------------------------------------------------------------------|--------|
| Analogue316 | 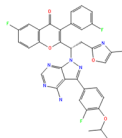  | -7.362 |
| Analogue317 |   | -7.260 |
| Analogue318 |   | -7.191 |
| Analogue319 |  | -7.232 |

|             |                                                                                      |        |
|-------------|--------------------------------------------------------------------------------------|--------|
| Analogue320 | 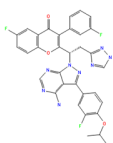  | -7.370 |
| Analogue321 |   | -7.230 |
| Analogue322 |   | -7.646 |
| Analogue323 |  | -7.295 |

|             |                                                                                      |        |
|-------------|--------------------------------------------------------------------------------------|--------|
| Analogue324 | 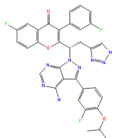  | -7.191 |
| Analogue325 |   | -7.292 |
| Analogue326 |   | -7.349 |
| Analogue327 |  | -7.436 |

|             |                                                                                      |        |
|-------------|--------------------------------------------------------------------------------------|--------|
| Analogue328 | 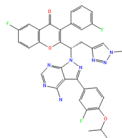  | -7.362 |
| Analogue329 |   | -7.649 |
| Analogue330 |   | -7.272 |
| Analogue331 |  | -7.303 |



|             |                                                                                      |        |
|-------------|--------------------------------------------------------------------------------------|--------|
| Analogue332 | 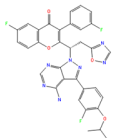  | -7.245 |
| Analogue333 |   | -7.200 |
| Analogue334 |   | -7.322 |
| Analogue335 |  | -7.274 |

|             |                                                                                      |        |
|-------------|--------------------------------------------------------------------------------------|--------|
| Analogue336 | 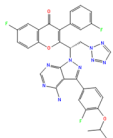  | -7.245 |
| Analogue337 |   | -7.234 |
| Analogue338 |   | -7.254 |
| Analogue339 |  | -7.225 |

|             |                                                                                      |        |
|-------------|--------------------------------------------------------------------------------------|--------|
| Analogue340 | 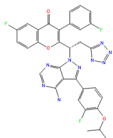  | -7.266 |
| Analogue341 |   | -7.299 |
| Analogue342 |   | -7.258 |
| Analogue343 |  | -7.314 |

|             |                                                                                      |        |
|-------------|--------------------------------------------------------------------------------------|--------|
| Analogue344 | 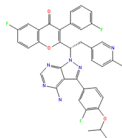  | -7.445 |
| Analogue345 |   | -7.415 |
| Analogue346 |   | -7.344 |
| Analogue347 |  | -7.331 |

|             |                                                                                      |        |
|-------------|--------------------------------------------------------------------------------------|--------|
| Analogue348 | 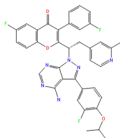  | -7.368 |
| Analogue349 |   | -7.411 |
| Analogue350 |   | -7.423 |
| Analogue351 |  | -7.352 |

|             |                                                                                      |        |
|-------------|--------------------------------------------------------------------------------------|--------|
| Analogue352 | 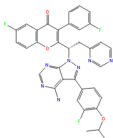  | -7.459 |
| Analogue353 |   | -7.322 |
| Analogue354 |   | -7.404 |
| Analogue355 |  | -7.357 |

|             |                                                                                      |        |
|-------------|--------------------------------------------------------------------------------------|--------|
| Analogue356 | 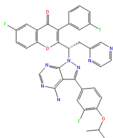  | -7.420 |
| Analogue357 |   | -7.335 |
| Analogue358 |   | -7.488 |
| Analogue359 |  | -7.452 |

|             |                                                                                      |        |
|-------------|--------------------------------------------------------------------------------------|--------|
| Analogue360 |   | -7.364 |
| Analogue361 |   | -7.254 |
| Analogue362 |   | -7.426 |
| Analogue363 |  | -7.280 |



|             |                                                                                      |        |
|-------------|--------------------------------------------------------------------------------------|--------|
| Analogue364 | 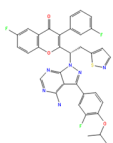  | -7.505 |
| Analogue365 |   | -7.344 |
| Analogue366 |   | -7.342 |
| Analogue367 |  | -7.566 |

|             |                                                                                      |        |
|-------------|--------------------------------------------------------------------------------------|--------|
| Analogue368 | 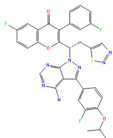  | -7.378 |
| Analogue369 |   | -7.378 |
| Analogue370 |   | -7.353 |
| Analogue371 |  | -7.241 |

|             |                                                                                      |        |
|-------------|--------------------------------------------------------------------------------------|--------|
| Analogue372 |   | -7.333 |
| Analogue373 |   | -7.219 |
| Analogue374 |   | -7.693 |
| Analogue375 |  | -7.585 |

|             |                                                                                      |        |
|-------------|--------------------------------------------------------------------------------------|--------|
| Analogue376 | 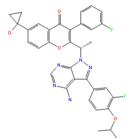  | -7.353 |
| Analogue377 |   | -7.636 |
| Analogue378 |   | -7.434 |
| Analogue379 |  | -7.635 |

|             |                                                                                      |        |
|-------------|--------------------------------------------------------------------------------------|--------|
| Analogue380 | 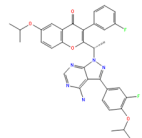  | -7.549 |
| Analogue381 |   | -7.296 |
| Analogue382 |   | -7.920 |
| Analogue383 |  | -6.151 |

|             |                                                                                      |        |
|-------------|--------------------------------------------------------------------------------------|--------|
| Analogue384 | 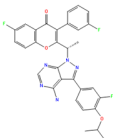  | -5.023 |
| Analogue385 |   | -5.845 |
| Analogue386 |   | -5.601 |
| Analogue387 |  | -5.735 |

|             |                                                                                      |        |
|-------------|--------------------------------------------------------------------------------------|--------|
| Analogue388 |   | -4.764 |
| Analogue389 |   | -5.307 |
| Analogue390 |   | -7.092 |
| Analogue391 |  | -6.727 |
